Nordlund et al, Running title: *Linked-read sequencing for digital karyotyping in ALL*

1 **Refined detection and phasing of structural aberrations in pediatric acute**  
2 **lymphoblastic leukemia by linked-read whole genome sequencing**

3

4 Jessica Nordlund<sup>1\*</sup>, Yanara Marincevic-Zuniga<sup>1</sup>, Lucia Cavelier<sup>2</sup>, Amanda Raine<sup>1</sup>, Tom  
5 Martin<sup>1</sup>, Anders Lundmark<sup>1</sup>, Jonas Abrahamsson<sup>3</sup>, Ulrika Norén-Nyström<sup>4</sup>, Gudmar  
6 Lönnerholm<sup>5</sup>, Ann-Christine Syvänen<sup>1</sup>

7

8 <sup>1</sup>Department of Medical Sciences, Molecular Medicine and Science for Life Laboratory, Uppsala  
9 University, Sweden

10 <sup>2</sup>Department of Immunology, Genetics and Pathology and Science for Life Laboratory, Uppsala  
11 University, Sweden

12 <sup>3</sup>Department of Pediatrics, Institution for Clinical Sciences, Sahlgrenska Academy, Gothenburg  
13 University, Gothenburg, Sweden

14 <sup>4</sup>Department of Clinical Sciences and Pediatrics, University of Umeå, Sweden

15 <sup>5</sup>Department of Women's and Children's Health, Pediatric Oncology, Uppsala University, Sweden

16

17 **Running title:** Linked-read sequencing for digital karyotyping in ALL

18

19 **Keywords:** Childhood acute lymphoblastic leukemia, next generation sequencing, linked-  
20 read WGS, fusion gene, structural variants

21

22 **\*Corresponding author:**

23 Dr. Jessica Nordlund

24 Molekylär Medicin, Box 1432, BMC

25 75144 Uppsala, Sweden

26 Telephone: +46 704250806

27 Email: [jessica.nordlund@medsci.uu.se](mailto:jessica.nordlund@medsci.uu.se)

## 28 ABSTRACT

29 Structural chromosomal rearrangements that may lead to in-frame gene-fusions represent a  
30 leading source of information for diagnosis, risk stratification, and prognosis in pediatric acute  
31 lymphoblastic leukemia (ALL). However, short-read whole genome sequencing (WGS)  
32 technologies struggle to accurately identify and phase such large-scale chromosomal  
33 aberrations in cancer genomes. We therefore evaluated linked-read WGS for detection of  
34 chromosomal rearrangements in an ALL cell line (REH) and primary samples of varying DNA  
35 quality from 12 patients diagnosed with ALL. We assessed the effect of input DNA quality on  
36 phased haplotype block size and the detectability of copy number aberrations (CNAs) and  
37 structural variants (SVs). Biobanked DNA isolated by standard column-based extraction  
38 methods was sufficient to detect chromosomal rearrangements even at low 10x sequencing  
39 coverage. Linked-read WGS enabled precise, allele-specific, digital karyotyping at a base-  
40 pair resolution for a wide range of structural variants including complex rearrangements and  
41 aneuploidy assessment. With use of haplotype information from the linked-reads, we also  
42 identified additional structural variants, such as a compound heterozygous deletion of *ERG* in  
43 a patient with the *DUX4-IGH* fusion gene. Thus, linked-read WGS allows detection of  
44 important pathogenic variants in ALL genomes at a resolution beyond that of traditional  
45 karyotyping or short-read WGS.

## 46 INTRODUCTION

47 Our ability to sequence complete human genomes has increased owing to next generation  
48 sequencing (NGS) technologies, but detecting the whole spectrum of somatic single  
49 nucleotide variants (SNVs), copy number alterations (CNAs), and structural variations (SVs)  
50 in cancer cells is still challenging as SVs and CNAs remain the most difficult variant classes  
51 to discern in genomic data (1). A major reason for this limitation is that the human genome is  
52 diploid, consisting of a maternal and a paternal set of homologous chromosomes, and  
53 molecular haplotyping of alleles across large genomic regions is beyond the resolution of  
54 current short-read NGS technologies (2).

55 New “linked-read” technology, by which single molecules are massively barcoded in a  
56 microfluidic format and subsequently sequenced using short-read NGS technology, allows  
57 determination of molecular haplotypes across mega-base regions of the genome (3,4). An  
58 advantage of linked-read whole genome sequencing (WGS) over standard short-read WGS  
59 is its enhanced ability to detect the breakpoints of large-scale SVs and to provide long-range  
60 haplotype information for phasing. The long, linked-reads have enabled the assignment of  
61 complex structural variants and chromosomal rearrangements to individual chromosomes in  
62 germline and cancer genomes (3,5,6). Thus, linked-read WGS has the potential to overcome  
63 some of the limitations of short-read WGS for gaining a complete view of the structure of all  
64 genetic variants in a genome.

65 Structural chromosomal rearrangements that may lead to aberrant gene-fusions  
66 represent a leading source of information for diagnosis, risk stratification and prognosis in  
67 pediatric acute lymphoblastic leukemia (ALL) (7). Several chromosomal aberrations are  
68 recurrent in ALL and are used for classification of genetic subtypes associated with clinical  
69 outcome (8,9). The standard methods applied in clinical genetics laboratories today, such as  
70 karyotyping (G-banding) and fluorescent *in situ* hybridization (FISH), do not adequately  
71 capture the full spectrum of complex aberrations in the ALL genomes. Thus, up to 30% of B-

72 cell precursor ALL (BCP-ALL) patients remain cytogenetically unclassified (10). WGS and  
73 whole-transcriptome sequencing (RNA-sequencing) technologies have enabled discovery of  
74 mutations, structural aberrations, and expressed gene-fusions in ALL (11-13). Recent large-  
75 scale RNA-sequencing studies have identified recurrent fusion genes with biological and  
76 clinical implications, such as those characterized by *DUX4*, *ZNF384*, and *MEF2D*  
77 rearrangements (14-19). However, only limited information is available on the chromosomal  
78 aberrations that are at the source of the gene-fusions and there are likely undetected  
79 structural aberrations with clinical importance yet to be discovered.

80 In the present study we evaluated if linked-read WGS technology could achieve the  
81 same level of detection as joint G-banding and FISH in a single linked-read WGS  
82 experiment. In our evaluation we focused on pathogenic structural aberrations in a set of  
83 well-characterized patients with pediatric ALL.

84

## 85 MATERIALS AND METHODS

### 86 *Patient samples*

87 This study included diagnostic samples from 12 children with acute lymphoblastic leukemia  
88 (ALL) enrolled on the Nordic Society of Pediatric Hematology and Oncology (NOPHO)  
89 protocols during 1998–2008 (8,20) and the t(12;21) cell line REH (21). Primary ALL samples  
90 were collected as described previously (22). The patients were selected from a large cohort  
91 of pediatric ALL patients based on presence of cytogenetic aberrations detected at diagnosis  
92 or expressed fusion genes detected by previous WGS or RNA-sequencing studies as well as  
93 availability of material from high blast count samples (**Supplementary Table S1**) (11,18,19).  
94 DNA and RNA were extracted from 2–10 million cells using the AllPrep DNA/RNA Mini Kit  
95 (Qiagen) or the MagAttract HMW DNA kit (Qiagen). Fifty nanograms of DNA from ALL\_370  
96 was subjected to whole genome amplification with the DNA REPLI-g Midi Kit (Qiagen). The  
97 DNA concentrations were measured using the Qubit dsDNA Broad Range assay (Invitrogen).



98 The study was approved by the Regional Ethics Review Board in Uppsala, Sweden and was  
99 conducted according to the guidelines of the Declaration of Helsinki. The patients or their  
100 guardians provided informed consent.

101

### 102 *Karyotyping and molecular diagnosis*

103 ALL diagnosis was established by analysis of leukemic cells with respect to morphology,  
104 immunophenotype, and cytogenetic aberrations. High hyperdiploidy (HeH) was defined as  
105 presence of 51–67 chromosomes per cell (23). FISH or RT-PCR analyses were used to  
106 screen for t(12;21)(p13;q22)[*ETV6-RUNX1*] and t(9;22)(q34;q11)[*BCR-ABL1*]. Whole  
107 chromosome paint (Metasystems XCP orange/green XCyting Chromosome Paints) and  
108 subtelomeric probes (Vysis Totalvision probes) were used to validate translocations on  
109 metaphase spreads from cultured bone marrow cells from patients ALL\_559, ALL\_707 and  
110 ALL\_386. The hybridized slides were analyzed using a Zeiss fluorescence microscope (Carl  
111 Zeiss) and chromosome-colored images were captured using the Isis software  
112 (MetaSystems).

113

### 114 *Library construction and sequencing*

115 Sequencing libraries were prepared from 1-1.2 ng of genomic DNA according to the  
116 manufacturer's instructions for preparation of GemCode and Chromium WGS libraries (10x  
117 Genomics). The DNA molecules were partitioned into droplets including a  
118 GemCode/Chromium barcode-specific gel bead (GEM) and subsequently amplified by PCR  
119 with combined adaptor tagging using GemCode/Chromium barcodes. The droplets were  
120 fractured to release the barcoded PCR products and subjected to construction of indexed  
121 libraries. GemCode libraries were sequenced on an Illumina HiSeq2500 instrument with a  
122 customized sequencing protocol (read1:98bp, i7:8bp, i5:14bp, read2:98) to an average depth  
123 of 14x. Chromium libraries were sequenced on an Illumina HiSeqX instrument with 150 bp  
124 paired-end reads to an average depth of 32x.

125

### 126 *Linked-read data analysis*

127 Linked-read WGS data was processed and analyzed using the Long Ranger pipeline from  
128 10x Genomics (v1.2.0 for GemCode and v2.1.6 for Chromium) with the hg19/GRCh37  
129 reference genome. The '-somatic' flag was used for the Chromium libraries. Data were  
130 visualized using the Loupe Genome Browser v2.1.1. Phasing haplotype reconstruction was  
131 performed by Long Ranger. SVs called by Long Ranger were manually reviewed and  
132 assessed against karyotype data, CNA data from Illumina Infinium arrays, and fusion genes  
133 detected by RNA-sequencing. Genomic copy number (CN) levels were estimated by  
134 chromosomal segmentation read-depth analysis in 10 Kb windows using the CNVnator  
135 software (24). B-allele frequencies were calculated from VCF files from Long Ranger using  
136 the VariantAnnotation package and custom scripts in R (25). Ideograms of derived  
137 chromosomes were drawn to scale with the CyDAS software (26).

138

### 139 *RNA-sequencing*

140 RNA-sequencing libraries from REH and ALL\_402 were constructed from 300ng total RNA  
141 with the TruSeq stranded total RNA protocol (RiboZero human/mouse/rat) according to the  
142 manufacturer's instructions (Illumina). The libraries were sequenced on a NovaSeq 6000  
143 instrument with 100 bp paired-end reads. Strand-specific RNA-sequencing data was  
144 previously been generated for all the remaining patient samples in the study, except from  
145 patient ALL\_370 (11,18,19). Fusion genes were called and validated using a previously  
146 described approach (19) based on FusionCatcher 0.99.7d (27).

147

### 148 *Copy Number Analysis*

149 Previously generated data from Infinium HumanMethylation450 BeadChips (450k arrays) are  
150 available at the Gene Expression Omnibus (GSE49031) (28). The R package  
151 "CopyNumber450kCancer" was used to detect CN alterations in the 450k array data (29).

152 Genomic DNA (200ng) from nine patient samples was subjected to genotyping on the  
153 Illumina HumanOmni2.5 Exome-8v1 SNP arrays according to the manufacturer's  
154 specifications (Illumina). CN alterations were called from the SNP array data using the Tumor  
155 Aberration Prediction Suite (30).

156

## 157 RESULTS

158 Eighteen sequencing libraries of which 13 were prepared with GemCode reagents and five  
159 were prepared with Chromium reagents were sequenced from 12 primary samples collected  
160 from pediatric ALL patients at diagnosis and from the REH ALL cell line using different types  
161 of input DNA (**Table 1**). The 18 libraries were sequenced to an average coverage of 14x and  
162 32x for GemCode and Chromium, respectively. The number of phased SNPs ranged from  
163 69-99% (mean 93%) and the longest phase blocks ranged from 0.3-18 megabases (Mb) in  
164 size (mean size 7 Mb) (**Supplementary Table S2**). The quality and type of input DNA as well  
165 as the sequencing coverage had the largest effect on the length and quality of phasing,  
166 however the majority of large structural aberrations in the ALL genomes remained detectable  
167 in un-phased regions in lower coverage libraries.

168

### 169 *Effect of input DNA*

170 High molecular weight DNA (HMW DNA) resulted in the longest phase blocks that spanned  
171 14-18 Mb of DNA, whilst standard column-based DNA preparations that had undergone  
172 repeated freeze-thawing without selection for HMW DNA fragments yielded shorter phase  
173 blocks ranging from 1-14 Mb (**Table 1**). The sizes of the longest and the N50 phase blocks  
174 correlated with the average size of the input DNA estimated by the Long Ranger software  
175 (**Figure 1A-B**). Shorter haplotype blocks were generated for the libraries prepared by  
176 GemCode (average ~5 Mb) compared to libraries prepared using Chromium reagents  
177 (average ~10 Mb), likely due to lower sequencing depth of the Gemcode libraries.

178 To directly compare the HMW and standard column-based DNA extractions, HMW  
179 DNA was freshly prepared from two samples harboring t(12;21) or t(9;22) and were  
180 compared to DNA extracted with a column-based method. GemCode libraries were prepared  
181 and sequenced to 10x coverage from each DNA sample. The expected genomic breakpoints  
182 were identified in both the HMW and standard DNA libraries (**Figure 1A-B**). However, the  
183 cumulative number of common barcodes shared between the two loci of each translocation  
184 yielded stronger signal intensities in the HMW DNA (60,044 and 26,316, **Figure 1C-D**,  
185 respectively) compared to the standard column-based DNA samples (12,733 and 7,500,  
186 **Figure 1E-F**, respectively).

187 To determine the utility of whole genome amplified (WGA) DNA for long-range  
188 phasing we compared the phasing performance of DNA that had been subjected to WGA  
189 (ALL\_370.1) to that of standard genomic DNA (ALL\_370.2). Not unexpectedly, the sample  
190 that had been subjected to WGA prior to sequencing library preparation (ALL\_370.1) yielded  
191 the poorest results, with the longest haplotype block only 0.3 Mb in length and with only 69%  
192 of the SNPs phased (**Table 1**). Due to the poor performance of WGA DNA, we excluded the  
193 results from the WGA library ALL\_370.1 from further analyses.

194

### 195 *Detection of chromosomal aberrations and copy number using linked-read WGS*

196 For seven of the 13 individual ALL genomes analyzed, detailed karyotype information was  
197 available by G-banding or FISH for subtype-defining genetic aberrations such as high  
198 hyperdiploidy (HeH), t(12;21), or t(9;22). Thus we were able to verify the results from the  
199 linked-read WGS data by comparison to that obtained from genetic analysis at diagnosis.  
200 The somatic genomic variants in the remaining six patients with either T-ALL or B-other  
201 subtype were determined in previous studies by a combination of diagnostic karyotyping,  
202 WGS, RNA-sequencing, or Infinium DNA methylation/SNP arrays (11,19). These six patients  
203 had complex or incomplete karyotype information as detected by G-banding and FISH at ALL  
204 diagnosis, and thus we aimed to better resolve the aberrations in these ALL genomes. We

205 used the Loupe software provided by 10x Genomics to screen for and identify the exact  
206 chromosomal breakpoints at base-pair resolution and the haplotypes of the large SVs in the  
207 ALL genomes. In all cases, we validated our findings using existing karyotype information,  
208 FISH (when cells were available), and/or a combination of Infinium arrays for copy number  
209 estimates and RNA-sequencing for detection of expressed fusion. The results for each  
210 patient and subtype are detailed below and in each case a revised karyotype after linked-  
211 read WGS is given in **Table 1**.

212

### 213 High Hyperdiploidy (HeH)

214 Two patients (ALL\_370 and ALL\_689) included in our study had the classical HeH subtype  
215 with 55 chromosomes and no detectable translocations by karyotyping and/or FISH. The  
216 aneuploidy estimates in the karyotype were consistent with Infinium array data for both  
217 patients (**Table 1**). Using the linked-read WGS data, we binned the average sequencing  
218 coverage in 10 Kb bins across the genome and scanned for copy-number alterations (CNAs)  
219 (**Figure 2A-B**). The linked-read WGS estimates of copy numbers correlated perfectly with  
220 that from the arrays and with the karyotype for ALL\_370 and ALL\_689. A third patient  
221 (ALL\_47) with “normal” (failed) karyotype at diagnosis was suspected to have the HeH  
222 subtype based on a previous study (18). For this patient we verified the HeH karyotype in the  
223 linked-read WGS data to be +4,+5,+6,+9,+10,+12,+14,+17,+18,-19,+19,+21,+21,+22, which  
224 was verified by CNA analysis (**Table 1; Figure 2C**). The copy neutral loss of chromosome 19  
225 (uniparental disomy) was visible in the linked-read WGS data by an overrepresentation of  
226 homozygous SNVs on chromosome 19 (**Supplementary Figure S1**). The chromosomal  
227 copy number alterations were successfully defined by linked-read WGS in each of the three  
228 HeH cases, with directly comparable results to traditional karyotyping and microarrays.

229

### 230 t(12;21) and t(9;22)

231 The t(12;21) translocation and associated aberrations were analyzed in two patients  
232 (ALL\_386 and ALL\_458) and the REH cell line (**Figure 3A-C**). As was anticipated from

233 diagnostic karyotyping and previous short-read WGS of patient ALL\_458 (11), a balanced  
234 t(12;21) translocation resulting in the expression of both the canonical *ETV6-RUNX1* and the  
235 reciprocal *RUNX1-ETV6* fusion genes was unambiguously detected at base-pair resolution in  
236 the linked-read WGS data (**Supplementary Figure S2**). A deletion spanning over a 2.1 Mb  
237 region that includes the second allele of *ETV6* was observed on the other haplotype. Besides  
238 gain of chromosome 10 and a 38 Mb deletion of chromosome 11q22-q25, no other large  
239 structural variants were identified in ALL\_458.

240 In contrast, for ALL\_386 and the REH cell line, karyotype data suggested complex re-  
241 arrangements involving *ETV6*, *RUNX1* and several other chromosomes. The diagnostic  
242 karyotype for patient ALL\_386 suggested a complex series of translocations including  
243 chromosomes 3, 12, 14 and 21, of which two of the translocations resulted in in-frame fusion  
244 genes: *DCAF5-ETV6* from a translocation between chromosomes 14q24.1 and 12p13.2 and  
245 *ETV6-RUNX1* from a translocation between 12p13.2 and 21q22.12 (19). The haplotype  
246 phasing information resolved an intragenic 0.15 Mb deletion of one allele of *ETV6* (haplotype  
247 1) and that the two fusion genes (*ETV6-RUNX1* and *DCAF5-ETV6*) originated from the  
248 second allele (haplotype 2) of *ETV6* (**Figure 3D**). Linked-read WGS resolved the exact  
249 breakpoints on chromosomes 3, 12 14 and 21 that were expected, and identified several  
250 additional alterations that were missed by genetic analysis at diagnosis. Of which, *DCAF5*  
251 (chr14) and the reciprocal *RUNX1* (chr21) loci were separated by a 44 Mb insertion of a  
252 region originating from chromosome 2q on the derived chromosome 14q (**Figure 3E**).  
253 Furthermore, a 650 kb region from chromosome 3p21.31 was inverted and inserted into the  
254 derived chromosome 3q21.2 arm where the material from chromosome 12p was  
255 translocated. A schematic overview of the derived chromosomes determined by linked-read  
256 WGS and validated by FISH is outlined in **Supplementary Figures S3-S4**.

257 The structure of the complex rearrangement involving chromosomes 4, 5, 12, 16 and  
258 21 in the REH cell line as determined by linked-read WGS was consistent with the reported  
259 karyotype (**Supplementary Figure S5**). Both alleles of chromosomes 12 were involved in  
260 translocations with breakpoints occurring in proximity of, or within, the *ETV6* gene. One allele

261 of chromosome 12 is involved in a balanced t(5;12) translocation with a flanking 0.6 Mb  
262 deletion at the *ETV6* locus. The second allele was involved in a series of translocations  
263 between chromosomes 4, 12, 21, and 16 in which the *ETV6-RUNX1* fusion gene was  
264 formed. RNA-sequencing confirmed expression of *ETV6-RUNX1* from t(12;21) and *RUNX1-*  
265 *PRDM7* from t(16;21), but no expressed fusion genes were observed arising from the other  
266 breakpoints (**Figure 3C**). The inversion of chromosome 12p13.2-q23.1 expected from the  
267 karyotype was observed in the linked-read data. A duplication of chromosome 18 and an  
268 inversion of chromosome 5 were expected according to the REH karyotype, however we did  
269 not find evidence of these aberrations in the linked-read WGS or Infinium array data.

270 The genome of patient ALL\_402 was expected to harbor the t(9;22) translocation.  
271 Unexpectedly, linked-read WGS revealed a much more complex rearrangement involving the  
272 *BCR* (22q11.23), *ABL1* (9q34.12), *PRRC2B* (9q34.13), *SIL1* (5q31.2) and *LINC01128*  
273 (1p36.33) loci (**Supplementary Figure S6**). In addition to the deletion of chromosome 9p21  
274 reported in the karyotype, on chromosome 8 we detected a 35 Mb deletion (8p11.23-p23.3)  
275 and an amplification starting at 8p11.23 and continuing through the entire q-arm (**Figure 4A**).  
276 RNA-sequencing verified that the 5' end of *BCR* is fused with the 3' end of *ABL1*, the 5' ends  
277 of the reciprocal *ABL1* and *SIL1* loci form a head to head translocation resulting in two  
278 truncated transcripts, the 5' end of *LINC01128* is fused with the 3' end of *SIL1*, whilst the 5'  
279 end of *PRRC2B* is fused with the reciprocal 3' end of the *BCR* gene (**Figure 4B**). None of the  
280 complex rearrangements were phased in the linked-read sequencing data, but in this  
281 instance the phasing information was not necessary to fully resolve the structure of the  
282 breakpoints.

283 Taken together, we show that linked-read WGS has the power to detect both  
284 aneuploidies and translocations such as t(12;21) and t(9;22), and highly complex  
285 translocations that were either missed or miss-annotated by traditional karyotype analysis by  
286 G-banding and FISH at ALL diagnosis.

287

288 B-other



289 *DUX4* and *ZNF384*-rearrangements define newly described subtypes of BCP-ALL that were  
290 initially detected in large-scale RNA-sequencing studies (15,16,31). The *DUX4-IGH* fusion  
291 gene results from an insertion of the *DUX4* gene (subtelomeric region of chr4q and 10q), into  
292 the enhancer region of the *IGH* locus (chr14) (32). Prior to discovery of the *DUX4*  
293 rearrangement, this putative subgroup was referred to as “*ERG*-deleted” because of a high  
294 prevalence of *ERG* deletions and an otherwise normal karyotype (33,34). As was expected  
295 for the two patients with *DUX4-IGH* (ALL\_390 and ALL\_501), largely normal karyotypes were  
296 observed, with the exception of a large 93 Mb deletion on chromosome 6q14.1-q27 in  
297 ALL\_390 (**Supplementary Figure S7**). A large 6.5 Mb phase block on chromosome 21q22  
298 enabled detection of a compound heterozygous deletion of *ERG* transcript variant 1 (NCBI  
299 Reference Sequence: NM\_182918.3) in ALL\_390 with a 57.2 Kb deletion on haplotype 2  
300 spanning exons 3-10 and a second 9.3 Kb focal deletion of exon 1 on haplotype 1 (**Figure**  
301 **5A**). The Long Ranger software was not able to resolve the insertion of the 1.2 Kb *DUX4*  
302 gene into the enhancer region of the *IGH* locus in either patient. However, upon visual  
303 examination of raw reads with the aid of the Integrated Genome Viewer, we were able to  
304 identify split linked-reads supporting the insertion of at least one copy of *DUX4* into the *IGH*  
305 locus in the Chromium library ALL\_390.2, but not in the lower coverage GemCode libraries  
306 ALL\_390.1 or ALL\_501 (**Supplementary Figure S8**).

307 The most common fusion gene partners of *ZNF384* are the *TCF3* and *EP300* genes.  
308 Linked-read WGS determined the chromosomal breakpoints at base-pair resolution for the  
309 balanced translocations  $t(12;19)(p13.31;p13.3)[TCF3-ZNF384]$  in ALL\_604 and  
310  $t(12;22)(p13.31;q13.2)[EP300-ZNF384]$  in ALL\_613 (**Figure 5B-C**). The heterozygous  
311 deletions expected from karyotyping were resolved by the linked-read WGS data to include  
312 most of the q-arm of chromosome 7 (7q21.3-q36.3) and chromosome 6q16.2-q22.33 in  
313 ALL\_604. Although both Long Ranger and CNVnator failed to call the two aforementioned  
314 deletions, they were visible in both the linked-read sequencing coverage and Infinium array  
315 data (**Supplementary Figure S9**). In ALL\_613, a heterozygous deletion of chromosome



316 16q21-q24.3 and an amplification of the entire q arm of chromosome 1 were observed in the  
317 linked-read data. No other large-scale aberrations were detected in the two *ZNF384*  
318 rearranged cases.

319 One patient with a *PAX5-ELN* fusion gene (ALL\_707) detected by RNA-sequencing  
320 and short-read WGS was included (11). The karyotype indicated two derived chromosomes  
321 (chromosome 7 and 9) as well as a 9p deletion. Using linked-read WGS, we were able to  
322 better resolve the aberrations including the translocation t(7;9)(q11;p13) resulting in a  
323 derived chromosome 9 harboring the *PAX5-ELN* fusion gene, a truncated chromosome 7, as  
324 well as a heterozygous deletion of the chromosome 9p arm with the breakpoint in the *PAX5*  
325 locus on 9p13 (**Supplementary Figure S10**). The structure of the resulting derived  
326 chromosomes based on the linked-read WGS data is outlined together with FISH validation  
327 in **Figure 5D-F**.

328

### 329 T-ALL

330 Based on karyotype, a bi-allelic deletion of chromosome 9p21 and two translocations were  
331 expected involving chromosomes 7 and 9 and chromosomes 7 and 11 in ALL\_559. The  
332 homozygous deletion of chromosome 9p21 was clearly resolved in the linked-read WGS  
333 data (**Supplementary Figure S11**). Previously generated short-read WGS and RNA-  
334 sequencing data identified two translocations involving the T-cell receptor beta locus (*TRBC2*  
335 gene) on chromosome 7, namely t(7;11)(q34;p15)[*RIC3-TRBC2*] and t(7;9)(q34;q31)  
336 resulting in the fusion of *TRBC2* to a non-annotated transcript expressed on chromosome 9  
337 between the *TAL2* and *TMEM38B* genes (11). The linked-read data clarified that the two  
338 different alleles of *TRBC2* were involved in independent translocation events, as opposed to  
339 two different parts of the same allele in the case of a reciprocal event. First, the  
340 t(7;11)(q34;p15) resulting in expression of *RIC3-TRBC2* was a consequence of a balanced  
341 translocation of chromosome 7 involving one allele of *TRBC2* (**Figure 6A**). On the other  
342 allele of *TRBC2*, the t(7;9)(q34;q31) was accompanied by a 0.2 Mb deletion flanked by an

343 inversion of chromosome 7q34 (**Figure 6B-C**), a re-arrangement that was missed by both  
344 karyotyping and short-read WGS (11). FISH verified the derived chromosomes determined  
345 by linked-read WGS (**Figure 6D-F**).

346

#### 347 *Detection of key diagnostic deletions for ALL*

348 To further demonstrate that linked-read WGS is useful for detecting other types of  
349 aberrations than large-scale aneuploidies and translocations, we screened the 13 genomes  
350 (18 sequencing libraries) for focal deletions in a set of relevant genes for ALL including  
351 *BTG1*, *CDKN2A/B*, *EBF1*, *ETV6*, *IKZF1*, *PAX5*, *RB1* and *ERG* (35) (**Supplementary Figure**  
352 **S12**). Deletions of each gene were observed in at least one patient, with the exception of  
353 *RB1*. All of the deletions identified by linked-read WGS were verified by Infinium arrays. In  
354 the paired linked-read WGS libraries generated in different DNA samples from the same  
355 patient (REH.1, REH.2 and ALL\_402.1, ALL\_402.2) or created with different linked-read  
356 library preparation protocols (ALL\_47.1, ALL\_47.2 and ALL\_390.1, ALL\_390.2) identical  
357 deletion patterns were observed. The only exception was the compound heterozygous *ERG*  
358 deletion in ALL\_390 that was detected in the Chromium library ALL\_390.2, but not in the  
359 GemCode library ALL\_390.1, presumptively due to the lower sequence coverage. The three  
360 t(12;21) cases harbored *ETV6* deletions on the allele that was not affected by the  
361 translocation, thus resulting in bi-allelic disruption of *ETV6* in all cases. Consistent with  
362 previous studies (32,36), recurrent *BTG1* and *IKZF1* deletions were detected in the t(12;21)  
363 and *DUX4-IGH* patients, respectively (**Supplementary Figure S13**).

364

## 365 DISCUSSION

366 Herein we present the first ALL genomes to be analyzed by “linked-read” whole-genome  
367 sequencing technology. Linked-reads enabled highly accurate resolution of the majority of  
368 the genomic aberrations defined by cytogenetic methods and refined or identified new  
369 structural rearrangements in the 13 analyzed ALL genomes. Although the ALL subtypes and

370 numbers of samples included in the present study are modest, these results provide a strong  
371 proof of principle for linked-read WGS for digital karyotyping in ALL. Linked-read WGS is  
372 likely to be applicable to other types of malignancies where translocations and aneuploidies  
373 are common. Studies taking a similar approach in other cancer types such as triple negative  
374 breast cancer (37), metastatic gastric tumors (38) and cell lines (6) have reached similar  
375 conclusions.

376         Linked-read WGS requires long input DNA molecules to gain the most benefit from  
377 the technology (3). However, when working with clinical samples, high molecular weight DNA  
378 extraction and handling of HMW DNA is not practical in most clinical settings. Therefore, we  
379 chose to utilize DNA from patient samples that were prepared using a commonly used  
380 column-based DNA extraction method. Although the average length of the DNA was lower  
381 than the 50 Kb recommendation by the vendor 10x Genomics, our results show that DNA  
382 samples of suboptimal quality are also highly informative for detection genomic aberrations  
383 with linked-read WGS, with the exception of whole-genome amplified (WGA) DNA. In all  
384 instances where we compared HMW DNA to DNA from standard column extractions, and in  
385 most cases where we compared low-coverage GemCode to Chromium library preparation,  
386 the results were concordant. Although HMW DNA enabled phasing over chromosomal  
387 breakpoints, which makes interpretation of the chromosomal structure and organization  
388 easier, long DNA molecules and high sequencing depth may not be required for accurate  
389 detection of prognostically relevant aberrations present in the major clone of leukemic  
390 samples. In a linked-read WGS study on 23 cell lines, copy number variants were still  
391 detectable after sequencing down-sampling to as little as 1-2x coverage, whilst balanced  
392 events required approximately 10x coverage (6). It should be noted that these results were  
393 derived from HMW DNA extracted from cell lines, and that the results from HMW DNA from  
394 cell lines may not be applicable to real clinical specimens with shorter DNA fragments and  
395 varying percentages of contaminating normal cells.

396 In the present study, we focused on detecting large-scale structural aberrations,  
397 which are the most relevant type of aberrations for clinical care in ALL (39). We did not  
398 address rare somatic SNVs or small insertion-deletions (indels) that are also detectable in  
399 linked-read WGS data, which may be of clinical relevance in ALL (11,12,40). Based on our  
400 results, we believe that improvements of WGS library preparation and analysis introduced by  
401 linked-read technology, has the potential to capture the total load of all types of genomic  
402 variants in a single test. Although this new technology is in its infancy, we expect that digital  
403 karyotyping by WGS will replace, or at the least complement traditional clinical diagnostic  
404 methods such as G-banding and FISH in the future.

405

#### 406 Availability of data and materials

407 The linked-read WGS, RNA-sequencing and 450k DNA methylation array data sets from the  
408 REH cells have been deposited at GEO (GSE116057, submission in progress). Previously  
409 generated data from Infinium HumanMethylation450 BeadChips (450k arrays) are available  
410 at the GEO (GSE49031). The copy number data generated from the 450k DNA methylation  
411 array and SNP array used to determine copy number alterations (CNA) in the ALL patients is  
412 available at GEO (submission in progress). The patient/parent consent does not cover  
413 depositing data that may be used for large-scale determination of germline variants in a  
414 repository. The ALL samples were collected 10-20 years ago from pediatric patients aged 2-  
415 15 years, some whom have deceased. The linked-read WGS data and other dataset  
416 analyzed in the study are available upon reasonable request from the corresponding author  
417 Jessica.Nordlund@medsci.uu.se. A summary of additional data sets available for each  
418 patient is provided in Supplementary Table S1.

419

#### 420 Authors' contributions

421 JN and ACS designed the study. JN, YMZ, and AL analyzed data. AR and TM performed  
422 experiments. JA, UNN, and GL provided clinical material and karyotyping data. LC performed  
423 FISH experiments and provided expertise on karyotyping. JN, YMZ, and ACS wrote the  
424 paper.

425

## 426 Acknowledgements

427 Sequencing and SNP genotyping was performed by the SNP&SEQ Technology Platform,  
428 which is part of Science for Life Laboratory and the National Genomics Infrastructure at  
429 Uppsala University, supported by the Swedish Research Council (VR-RFI) and the Knut and  
430 Alice Wallenberg Foundation. Computational analysis was performed using resources  
431 provided by SNIC Uppsala Multidisciplinary Center for Advanced Computational Science. We  
432 especially thank our colleagues from NOPHO and the ALL patients who contributed samples  
433 to this study.

434 This work was supported by grants from the Selanders Stiftelse (JN), the Swedish  
435 Cancer Society (CAN2013/504, CAN2016/559; ACS), the Swedish Childhood Cancer  
436 Foundation (PR2014-0100; ACS), and the Swedish Research Council for Science and  
437 Technology (E0226301; ACS).

438

## 439 REFERENCES

- 440 1. Sheikine Y, Kuo FC, Lindeman NI. Clinical and Technical Aspects of Genomic  
441 Diagnostics for Precision Oncology. *Journal of clinical oncology : official journal of the*  
442 *American Society of Clinical Oncology* **2017**;35:929-33
- 443 2. Porubsky D, Garg S, Sanders AD, Korbel JO, Guryev V, Lansdorp PM, *et al.* Dense  
444 and accurate whole-chromosome haplotyping of individual genomes. *Nature*  
445 *communications* **2017**;8:1293

- 446 3. Zheng GX, Lau BT, Schnall-Levin M, Jarosz M, Bell JM, Hindson CM, *et al.*  
447 Haplotyping germline and cancer genomes with high-throughput linked-read  
448 sequencing. *Nature biotechnology* **2016**;34:303-11
- 449 4. Weisenfeld NI, Kumar V, Shah P, Church DM, Jaffe DB. Direct determination of  
450 diploid genome sequences. *Genome research* **2017**;27:757-67
- 451 5. Mostovoy Y, Levy-Sakin M, Lam J, Lam ET, Hastie AR, Marks P, *et al.* A hybrid  
452 approach for de novo human genome sequence assembly and phasing. *Nature*  
453 *methods* **2016**;13:587-90
- 454 6. Garcia S, Williams S, Herschleb J, Marks P, Xu AW, Schnall-Levin M, *et al.* Linked-  
455 Read Sequencing for Molecular Cytogenetics. *J Mol Diagn* **2017**;19:945-
- 456 7. Iacobucci I, Mullighan CG. Genetic Basis of Acute Lymphoblastic Leukemia. *Journal*  
457 *of Clinical Oncology* **2017**;0:JCO.2016.70.7836
- 458 8. Schmiegelow K, Forestier E, Hellebostad M, Heyman M, Kristinsson J, Soderhall S,  
459 *et al.* Long-term results of NOPHO ALL-92 and ALL-2000 studies of childhood acute  
460 lymphoblastic leukemia. *Leukemia* **2010**;24:345-54
- 461 9. Moorman AV. The clinical relevance of chromosomal and genomic abnormalities in B-  
462 cell precursor acute lymphoblastic leukaemia. *Blood reviews* **2012**;26:123-35
- 463 10. Pui CH, Yang JJ, Hunger SP, Pieters R, Schrappe M, Biondi A, *et al.* Childhood  
464 Acute Lymphoblastic Leukemia: Progress Through Collaboration. *Journal of Clinical*  
465 *Oncology* **2015**;33:2938-U24
- 466 11. Lindqvist CM, Nordlund J, Ekman D, Johansson A, Moghadam BT, Raine A, *et al.*  
467 The mutational landscape in pediatric acute lymphoblastic leukemia deciphered by  
468 whole genome sequencing. *Human mutation* **2015**;36:118-28
- 469 12. Holmfeldt L, Wei L, Diaz-Flores E, Walsh M, Zhang J, Ding L, *et al.* The genomic  
470 landscape of hypodiploid acute lymphoblastic leukemia. *Nature genetics*  
471 **2013**;45:242-52

- 472 13. Tran AN, Taylan F, Zachariadis V, Ofverholm I, Lindstrand A, Vezzi F, *et al.* High-  
473 resolution detection of chromosomal rearrangements in leukemias through mate pair  
474 whole genome sequencing. *Plos One* **2018**;13
- 475 14. Gianfelici V, Chiaretti S, Demeyer S, Di Giacomo F, Messina M, La Starza R, *et al.*  
476 RNA sequencing unravels the genetics of refractory/relapsed T-cell acute  
477 lymphoblastic leukemia. Prognostic and therapeutic implications. *Haematologica*  
478 **2016**;101:941-50
- 479 15. Lilljebjorn H, Henningsson R, Hyrenius-Wittsten A, Olsson L, Orsmark-Pietras C, von  
480 Palffy S, *et al.* Identification of ETV6-RUNX1-like and DUX4-rearranged subtypes in  
481 paediatric B-cell precursor acute lymphoblastic leukaemia. *Nature communications*  
482 **2016**;7:11790
- 483 16. Yasuda T, Tsuzuki S, Kawazu M, Hayakawa F, Kojima S, Ueno T, *et al.* Recurrent  
484 DUX4 fusions in B cell acute lymphoblastic leukemia of adolescents and young  
485 adults. *Nature genetics* **2016**;48:569-74
- 486 17. Marincevic-Zuniga Y, Zachariadis V, Cavelier L, Castor A, Barbany G, Forestier E, *et*  
487 *al.* PAX5-ESRRB is a recurrent fusion gene in B-cell precursor pediatric acute  
488 lymphoblastic leukemia. *Haematologica* **2016**;101:e20-3
- 489 18. Nordlund J, Backlin CL, Zachariadis V, Cavelier L, Dahlberg J, Ofverholm I, *et al.*  
490 DNA methylation-based subtype prediction for pediatric acute lymphoblastic  
491 leukemia. *Clinical epigenetics* **2015**;7:11
- 492 19. Marincevic-Zuniga Y, Dahlberg J, Nilsson S, Raine A, Nystedt S, Lindqvist CM, *et al.*  
493 Transcriptome sequencing in pediatric acute lymphoblastic leukemia identifies fusion  
494 genes associated with distinct DNA methylation profiles. *Journal of hematology &*  
495 *oncology* **2017**;10:148
- 496 20. Biondi A, Schrappe M, De Lorenzo P, Castor A, Lucchini G, Gandemer V, *et al.*  
497 Imatinib after induction for treatment of children and adolescents with Philadelphia-  
498 chromosome-positive acute lymphoblastic leukaemia (EsPhALL): a randomised,  
499 open-label, intergroup study. *The Lancet Oncology* **2012**;13:936-45



- 500 21. Rosenfeld C, Goutner A, Choquet C, Venuat AM, Kayibanda B, Pico JL, *et al.*  
501 Phenotypic characterisation of a unique non-T, non-B acute lymphoblastic leukaemia  
502 cell line. *Nature* **1977**;267:841-3
- 503 22. Milani L, Lundmark A, Kiialainen A, Nordlund J, Flaegstad T, Forestier E, *et al.* DNA  
504 methylation for subtype classification and prediction of treatment outcome in patients  
505 with childhood acute lymphoblastic leukemia. *Blood* **2010**;115:1214-25
- 506 23. Paulsson K, Johansson B. High hyperdiploid childhood acute lymphoblastic leukemia.  
507 *Genes, chromosomes & cancer* **2009**;48:637-60
- 508 24. Abyzov A, Urban AE, Snyder M, Gerstein M. CNVnator: an approach to discover,  
509 genotype, and characterize typical and atypical CNVs from family and population  
510 genome sequencing. *Genome research* **2011**;21:974-84
- 511 25. Obenchain V, Lawrence M, Carey V, Gogarten S, Shannon P, Morgan M.  
512 VariantAnnotation: a Bioconductor package for exploration and annotation of genetic  
513 variants. *Bioinformatics* **2014**;30:2076-8
- 514 26. Hiller B, Bradtke J, Balz H, Rieder H. CyDAS: a cytogenetic data analysis system.  
515 *Bioinformatics* **2005**;21:1282-3
- 516 27. Nicorici DS, M.; Edgren, H.; Kangaspeska, S.; Murumagi, A.; Kallioniemi, O.;  
517 Virtanen, S.;Kilkku, O. FusionCatcher - a tool for finding somatic fusion genes in  
518 paired-end RNA-sequencing data. bioRxiv doi: <http://dxdoiorg/101101/011650> **2014**
- 519 28. Nordlund J, Backlin CL, Wahlberg P, Busche S, Berglund EC, Eloranta ML, *et al.*  
520 Genome-wide signatures of differential DNA methylation in pediatric acute  
521 lymphoblastic leukemia. *Genome biology* **2013**;14:r105
- 522 29. Marzouka NA, Nordlund J, Backlin CL, Lonnerholm G, Syvanen AC, Carlsson Almlof  
523 J. CopyNumber450kCancer: baseline correction for accurate copy number calling  
524 from the 450k methylation array. *Bioinformatics* **2016**;32:1080-2
- 525 30. Rasmussen M, Sundstrom M, Goransson Kultima H, Botling J, Micke P, Birgisson H,  
526 *et al.* Allele-specific copy number analysis of tumor samples with aneuploidy and  
527 tumor heterogeneity. *Genome biology* **2011**;12:R108



- 528 31. Liu YF, Wang BY, Zhang WN, Huang JY, Li BS, Zhang M, *et al.* Genomic Profiling of  
529 Adult and Pediatric B-cell Acute Lymphoblastic Leukemia. *EBioMedicine* **2016**;8:173-  
530 83
- 531 32. Zhang J, McCastlain K, Yoshihara H, Xu B, Chang Y, Churchman ML, *et al.*  
532 Deregulation of DUX4 and ERG in acute lymphoblastic leukemia. *Nature genetics*  
533 **2016**;48:1481-9
- 534 33. Clappier E, Auclerc MF, Rapon J, Bakkus M, Caye A, Khemiri A, *et al.* An intragenic  
535 ERG deletion is a marker of an oncogenic subtype of B-cell precursor acute  
536 lymphoblastic leukemia with a favorable outcome despite frequent IKZF1 deletions.  
537 *Leukemia* **2014**;28:70-7
- 538 34. Harvey RC, Mullighan CG, Wang X, Dobbin KK, Davidson GS, Bedrick EJ, *et al.*  
539 Identification of novel cluster groups in pediatric high-risk B-precursor acute  
540 lymphoblastic leukemia with gene expression profiling: correlation with genome-wide  
541 DNA copy number alterations, clinical characteristics, and outcome. *Blood*  
542 **2010**;116:4874-84
- 543 35. Moorman AV, Enshaei A, Schwab C, Wade R, Chilton L, Elliott A, *et al.* A novel  
544 integrated cytogenetic and genomic classification refines risk stratification in pediatric  
545 acute lymphoblastic leukemia. *Blood* **2014**;124:1434-44
- 546 36. Schwab CJ, Chilton L, Morrison H, Jones L, Al-Shehhi H, Erhorn A, *et al.* Genes  
547 commonly deleted in childhood B-cell precursor acute lymphoblastic leukemia:  
548 association with cytogenetics and clinical features. *Haematologica* **2013**;98:1081-8
- 549 37. Kawazu M, Kojima S, Ueno T, Totoki Y, Nakamura H, Kunita A, *et al.* Integrative  
550 analysis of genomic alterations in triple-negative breast cancer in association with  
551 homologous recombination deficiency. *PLoS genetics* **2017**;13:e1006853
- 552 38. Greer SU, Nadauld LD, Lau BT, Chen J, Wood-Bouwens C, Ford JM, *et al.* Linked  
553 read sequencing resolves complex genomic rearrangements in gastric cancer  
554 metastases. *Genome medicine* **2017**;9:57

22 | Nordlund et al, Running title: *Linked-read sequencing for digital karyotyping in ALL*

555 39. Janeway KA, Place AE, Kieran MW, Harris MH. Future of clinical genomics in  
556 pediatric oncology. *Journal of clinical oncology : official journal of the American*  
557 *Society of Clinical Oncology* **2013**;31:1893-903

558 40. Grobner SN, Worst BC, Weischenfeldt J, Buchhalter I, Kleinheinz K, Rudneva VA, *et*  
559 *al.* The landscape of genomic alterations across childhood cancers. *Nature*  
560 **2018**;555:321-7

561

562

## 563 TABLES AND FIGURE LEGENDS

564 **Table 1.** Patient characteristics and linked-read WGS library statistics.

565

566 **Figure 1.** Effect of genomic DNA fragment size on phasing and detection of fusion genes.

567 The weighted average DNA size estimated by the 10x Genomics Long Ranger software is  
568 plotted against (A) the size of the largest phase block and (B) the median size (N50) of the  
569 phase block. High molecular weight (HMW) DNA (red dots), DNA extracted with a column-  
570 based method (standard, green triangles), and DNA that was been whole-genome amplified  
571 (WGA, blue squares) are indicated in the plots. (C-F) Heatmaps of overlapping linked reads  
572 supporting inter-chromosomal translocations are plotted in orange (10x Genomics Loupe  
573 software). HMW DNA extracted from the (C) REH cell line harboring t(12;21) and patient  
574 ALL\_402 harboring t(9;22) (D). Standard column extracted DNA from the REH cell line (E)  
575 and from patient ALL\_402 (F). The expected breakpoints in the fusion genes were identified  
576 in both HMW standard column DNA extractions.

577

578 **Figure 2:** Copy number by chromosome for the three ALL patients with the HeH subtype (A-  
579 C). The average linked-read WGS coverage data calculated in 10kb bins is plotted in the top  
580 row of each panel. The Log R ratios from Infinium SNP and/or 450k array data are visualized  
581 in the lower part of each panel. Red coloring indicates chromosomal gains according to the  
582 color key above panel A.

583

584 **Figure 3:** Structural aberrations detected by linked-read WGS in t(12;21)*ETV6-RUNX1*  
585 genomes. A-C) Circos plots for patients ALL\_386, ALL\_458 and the REH cell line. The first  
586 (outer) track shows the chromosomes and their banding, the second track shows log R ratios  
587 from Infinium arrays, the third track shows copy number determined by linked-read WGS in  
588 10kb bins, and the fourth (innermost) track shows copy number calls using the CNVnator  
589 software. Red indicates amplifications and blue indicates deletions. Expressed fusion genes

590 are highlighted within each circos plot, solid lines indicate in-frame fusion genes. D) Linked-  
591 reads mapped to two haplotypes at the *ETV6* locus in patient ALL\_386, which depicts a  
592 deletion on haplotype 1 (indicated by the red box) and the breakpoint giving rise to the  
593 *DCAF5-ETV6* and the *ETV6-RUNX1* fusion genes is indicated by a dashed line on the other  
594 allele (haplotype 2). E) Schematic representation of the chromosomal rearrangements  
595 resulting in derived chromosomes as determined by linked-read WGS in ALL\_386. The  
596 ideograms are drawn to scale using the CyDAS software. The resulting fusion transcripts  
597 with breakpoints are drawn alongside the chromosomes involved in the translocations.

598

599 **Figure 4:** Complex structural rearrangements in the patient ALL\_402. A) A circos plot  
600 depicting the genome-wide copy number changes in ALL\_402. The first (outer) track shows  
601 each chromosome and their banding, the second track shows log R ratios from infinium  
602 arrays, the third track shows copy number determined by linked-read WGS in 10kb bins, and  
603 the fourth (innermost) track shows copy number calls using the CNVnator software. Red  
604 indicates amplifications and blue indicates deletions. Expressed fusion genes are highlighted  
605 inside of the circos plot, solid lines indicate in-frame and dashed lines indicate out of frame  
606 fusion or truncated genes. B) The derived chromosomes as outlined using linked-read WGS.  
607 The structures of the expressed fusion genes are shown alongside their derived  
608 chromosomes with the direction of transcription indicated by arrows. The ideograms are  
609 drawn to scale using the CyDAS software.

610

611 **Figure 5.** Structural rearrangements detected in B-other patients by linked-read WGS. A)  
612 Linked-reads mapped to each of the two homologous chromosomes at the *ERG* locus on  
613 chromosome 21 in patient ALL\_390. Reads are color-coded by chromosome and deletions  
614 are marked by red squares. B-C) Heatmaps of overlapping linked-reads supporting subtype-  
615 defining balanced inter-chromosomal translocations from the 10x Genomic's Loupe software.  
616 (B) The genomic breakpoint in chromosomes 12 and 19, resulting in the *TCF3-ZNF384*  
617 fusion gene in patient ALL\_604. (C) The genomic breakpoint in chromosomes 12 and 22,

618 resulting in the *EP300-ZNF384* fusion gene in the patient ALL\_613. D) Ideogram of the  
619 structure of the translocation between chromosome 7 and 9 in the patient ALL\_707 resulting  
620 in the *PAX5-ELN* fusion gene, which is shown besides the derived chromosome 9 with the  
621 direction of the transcription indicated by an arrow. The chromosomes are drawn to scale  
622 using the CyDAS software. (E-F) Validation of the chromosome 7q deletion and derived  
623 chromosome 9 by FISH in the patient ALL\_707.

624

625 **Figure 6.** Chromosomal aberrations in the patient ALL\_559 (T-ALL) determined by linked-  
626 read WGS. (A-C) Heatmaps from the 10x Genomics Loupe software of overlapping linked-  
627 reads indicating genomic rearrangements. (A) A balanced translocation between  
628 chromosomes 7 and 11. (B) A translocation between chromosomes 7 and 9, which is  
629 accompanied by a 0.2 Mb deletion flanked by an inversion of chromosome 7q34 on the  
630 second allele at the *TRBC2* locus. The translocation results in an expressed fusion gene  
631 between *TRBC2* and a non-annotated gene located 500 bp upstream of *TMEM38B* on  
632 chromosome 9. (C) Zoomed in view of the inversion flanking the *TRBC2* locus on 7q34. (D)  
633 Ideogram of the structure of the translocations observed in ALL\_559. The chromosomes are  
634 drawn to scale using the CyDAS software. (E) Whole chromosomal paint depicting the  
635 translocation of material from chromosome 7 to chromosomes 9 and 11. (F) Whole  
636 chromosomal paint of chromosome 9 depicting the balanced translocation involving  
637 chromosome 7.

Table 1. Patient characteristics and linked-read WGS library statistics.

| Patient ID | Subtype      | Library Name | DNA extraction method | Library Type | Average sequencing depth | Weighted mean molecule length (Kb) | SNPs phased | Longest phase block (Mb) | N50 phase block (Mb) | Large structural variant calls | Revised karyotype after linked-read WGS <sup>a</sup>                                                                                                                                                                                                                                 |
|------------|--------------|--------------|-----------------------|--------------|--------------------------|------------------------------------|-------------|--------------------------|----------------------|--------------------------------|--------------------------------------------------------------------------------------------------------------------------------------------------------------------------------------------------------------------------------------------------------------------------------------|
| ALL_370    | HeH          | ALL_370.1    | Standard column + WGA | GemCode      | 18                       | 28                                 | 0.69        | 0.28                     | 0.01                 | 0                              | 55,XX,+X,+4,+6,+10,+14,+17,+18,+21,+21                                                                                                                                                                                                                                               |
|            |              | ALL_370.2    | Standard column       | GemCode      | 21                       | 49                                 | 0.83        | 0.92                     | 0.06                 | 2                              |                                                                                                                                                                                                                                                                                      |
| ALL_689    | HeH          | ALL_689      | Standard column       | GemCode      | 22                       | 70                                 | 0.97        | 9.87                     | 1.37                 | 11                             | <b>54,XX,+X,dup(1)(q24q42),+4,+6,+10,+14,+17,+18,+21</b>                                                                                                                                                                                                                             |
| ALL_47     | HeH          | ALL_47.2     | Standard column       | Chromium     | 33                       | 60                                 | 0.99        | 14.15                    | 2.27                 | 30                             | <b><u>58,XY,+4,+5,+6,+9,+10,+12,+14,+17,+18,-19,+19,+21,+21,+22</u></b>                                                                                                                                                                                                              |
|            |              | ALL_47.1     | Standard column       | GemCode      | 21                       | 66                                 | 0.96        | 7.26                     | 1.26                 | 9                              |                                                                                                                                                                                                                                                                                      |
| ALL_458    | ETV6-RUNX1   | ALL_458      | Standard column       | GemCode      | 9                        | 56                                 | 0.82        | 3.36                     | 0.44                 | 5                              | <b><u>47,XY,+10,del(11)(q22.1q25),t(12;21)(p13.2;q22),del(12)(p12.1p13.2)</u></b>                                                                                                                                                                                                    |
| ALL_386    | ETV6-RUNX1   | ALL_386      | Standard column       | Chromium     | 26                       | 37                                 | 0.98        | 5.00                     | 0.80                 | 424                            | <b><u>46,XY,del(2)(q33.1q37.3),der(3)del(3)(p21.2p21.31)t(3;12)(p21.31;q24)ins(3;3)(q21.2;p21.31p21.31),der(12)t(14;12)(q24.1;p13.2)t(3;12)(q21.3;q24.11),del(12)(p13.2),der(14)t(14;2)(q24.1;q37.3)t(2;21)(q33.1;q22.12),del(19)(q13.3q13.43),der(21)t(12;21)(p13.2;q22.12)</u></b> |
| REH        | ETV6-RUNX1   | REH.1        | MagAttract - HMW      | Gemcode      | 11                       | 128                                | 0.90        | 14.02                    | 2.24                 | 29                             | <b><u>46,X,-X,del(3)(p14.2p22.3),der(4)t(4;16)(q32.1;q24.3),t(5;12)(q23.2;p13.2),der(12)inv(12)(p12q24)t(4;12)(q32;q23),der(16)t(16;21)(q24.3;q22.12),+16,der(21)t(12;21)(p13.2;q22.12)</u></b>                                                                                      |
|            |              | REH.2        | Standard column       | Gemcode      | 10                       | 62                                 | 0.92        | 7.58                     | 1.14                 | 24                             |                                                                                                                                                                                                                                                                                      |
| ALL_402    | BCR-ABL1     | ALL_402.1    | MagAttract - HMW      | Gemcode      | 11                       | 126                                | 0.92        | 18.04                    | 3.27                 | 12                             | 46,XY,t(1;5;9;22)(p36.33;q31.2;q34.12;q11.23),del(8)(p11p23),dup(8)(p11.23q24.3),del(9)(p21p21)                                                                                                                                                                                      |
|            |              | ALL_402.2    | Standard column       | Gemcode      | 10                       | 42                                 | 0.84        | 2.03                     | 0.28                 | 6                              |                                                                                                                                                                                                                                                                                      |
| ALL_390    | DUX4-IGH     | ALL_390.1    | Standard column       | GemCode      | 21                       | 62                                 | 0.97        | 7.65                     | 1.27                 | 6                              | 46,XX,del(6)(q14.1q27)                                                                                                                                                                                                                                                               |
|            |              | ALL_390.2    | Standard column       | Chromium     | 31                       | 50                                 | 0.99        | 9.46                     | 1.87                 | 32                             |                                                                                                                                                                                                                                                                                      |
| ALL_501    | DUX4-IGH     | ALL_501      | Standard column       | GemCode      | 10                       | 59                                 | 0.89        | 3.50                     | 0.58                 | 6                              | 46,XX                                                                                                                                                                                                                                                                                |
| ALL_604    | TCF3-ZNF384  | ALL_604      | Standard column       | Chromium     | 32                       | 49                                 | 0.99        | 10.74                    | 1.76                 | 46                             | 46,XY,del(6)(q16.2q22.33),del(7)(q21.3q36.3),t(12;19)(p13.31;p13.3)                                                                                                                                                                                                                  |
| ALL_613    | EP300-ZNF384 | ALL_613      | Standard column       | Chromium     | 36                       | 52                                 | 0.99        | 11.47                    | 1.85                 | 48                             | 46,XY,dup(1)(q21q44),t(12;22)(p13.2;q13.2),del(16)(q21q24.3)                                                                                                                                                                                                                         |
| ALL_707    | PAX5-ELN     | ALL_707      | Standard column       | GemCode      | 10                       | 60                                 | 0.88        | 5.23                     | 0.63                 | 5                              | 46,XY,del(7)(q11),der(9)t(7;9)(q11;p13),del(9)(p13p24)                                                                                                                                                                                                                               |
| ALL_559    | T-ALL        | ALL_559      | Standard column       | GemCode      | 9                        | 61                                 | 0.81        | 2.36                     | 0.43                 | 8                              | 46,XY,der(7)t(7;9)(q34;q31),t(7;11)(q34;p15),der(9)t(7;9)(q34;q31)del(9)(p21p21),del(9)(p21p21)                                                                                                                                                                                      |

<sup>a</sup> The parts of the karyotype revised after linked-read WGS are highlighted in bold and underlined.

**Figure 1**

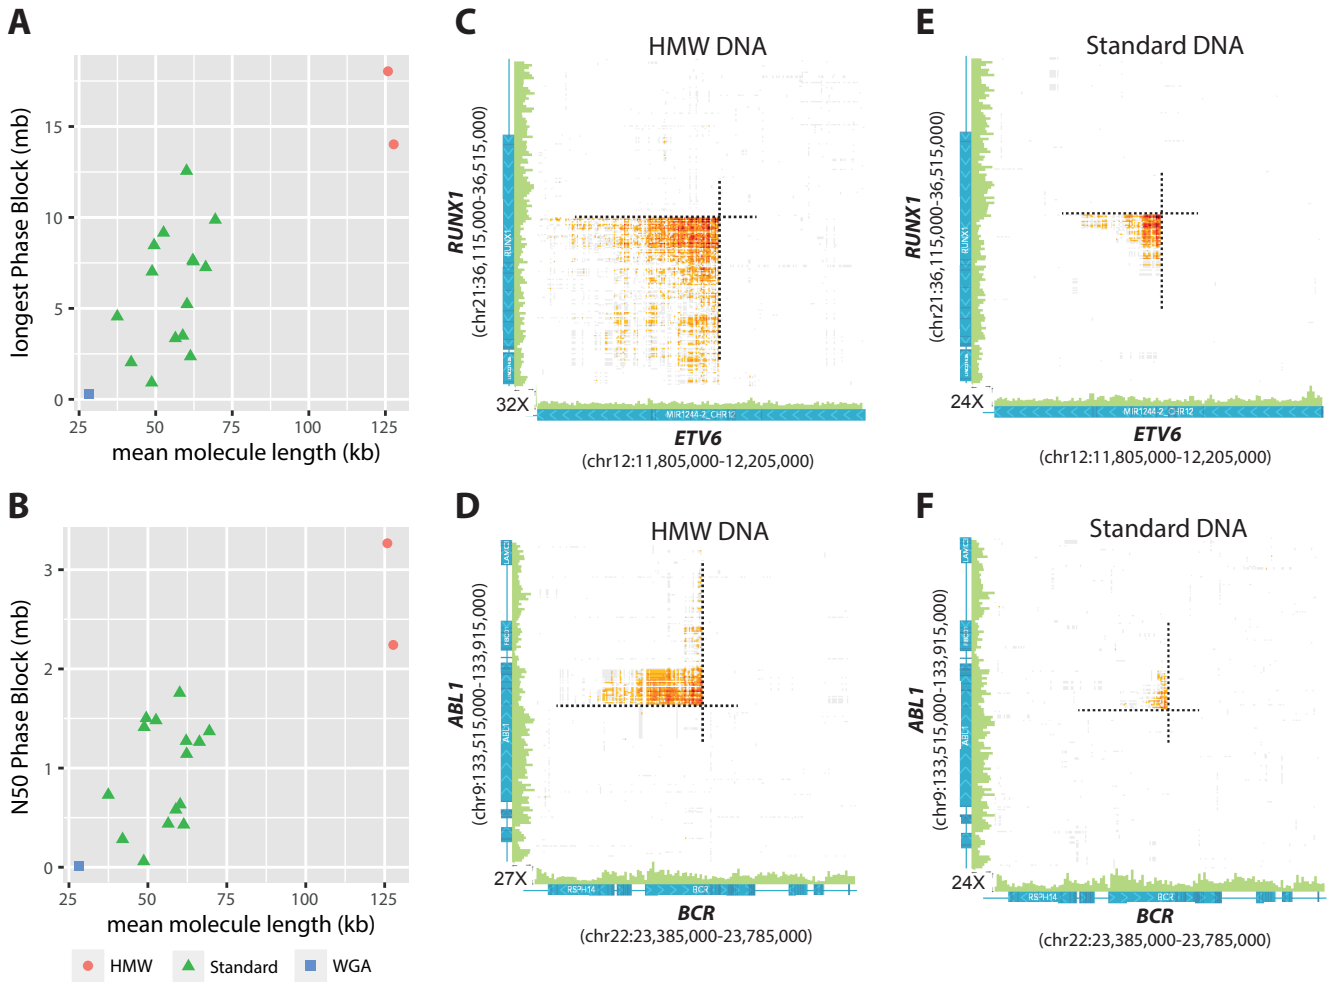

## Figure 2

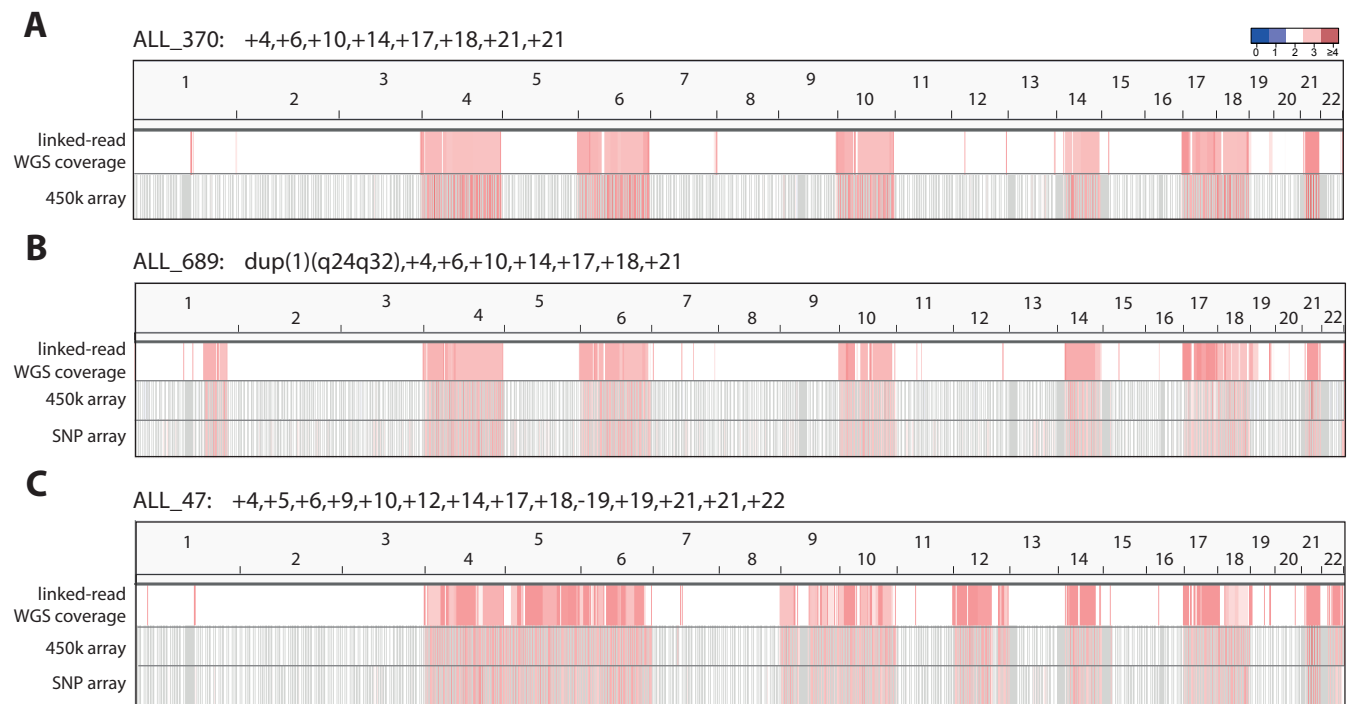



### Figure 3

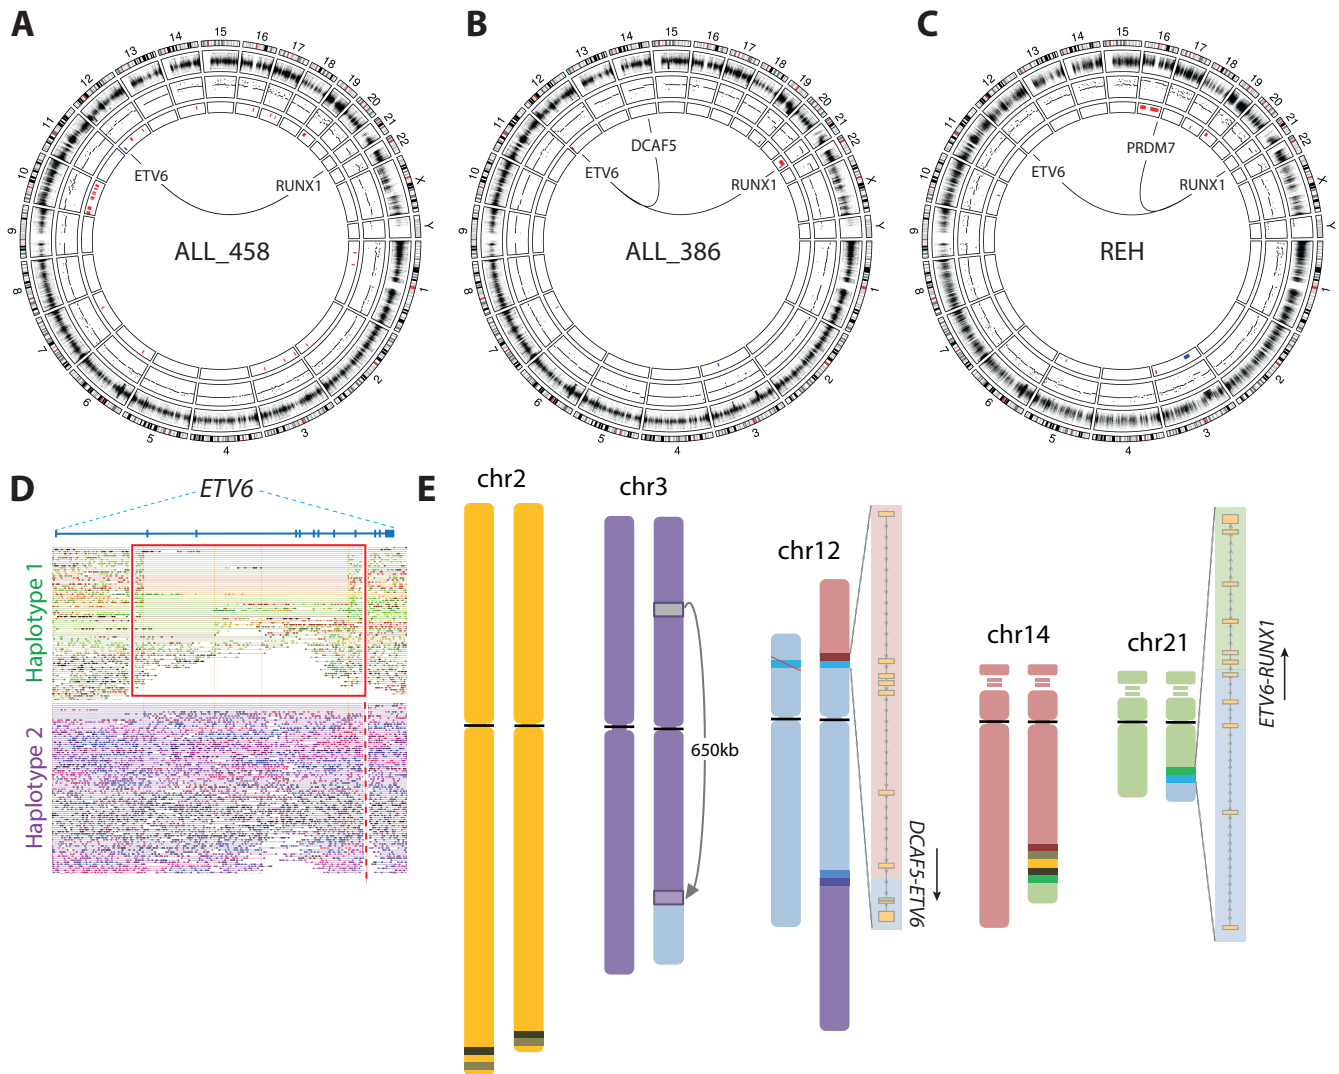

**Figure 4**

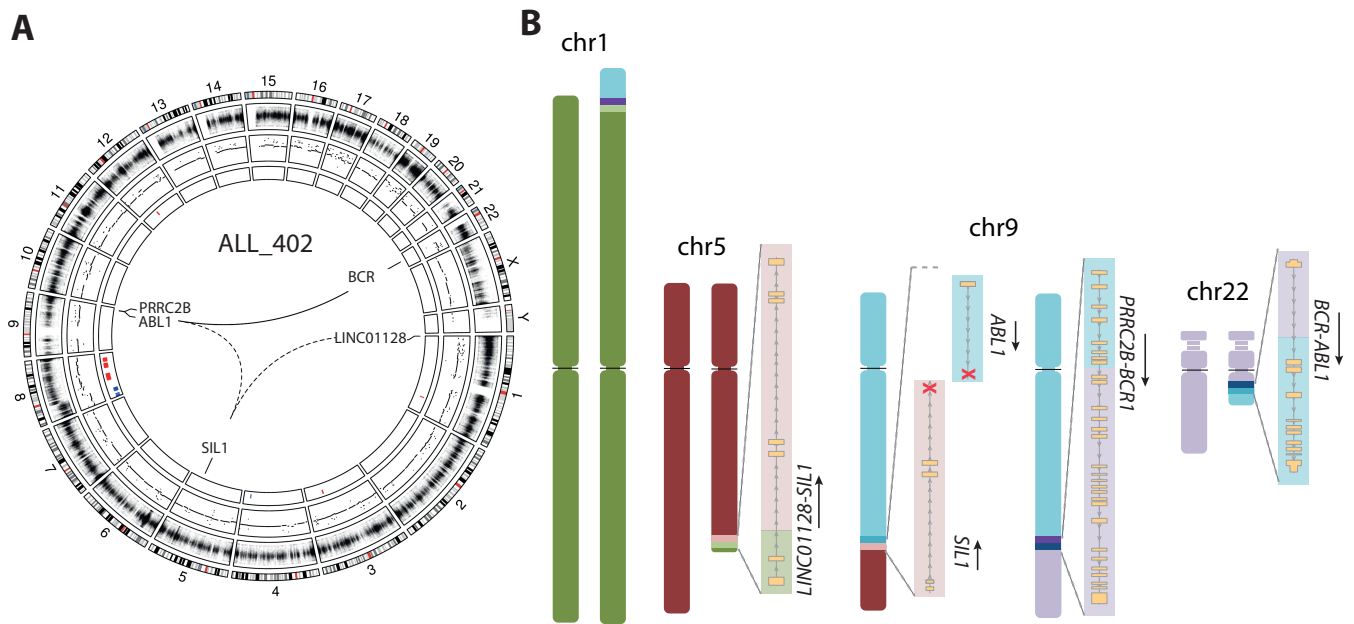

## Figure 5

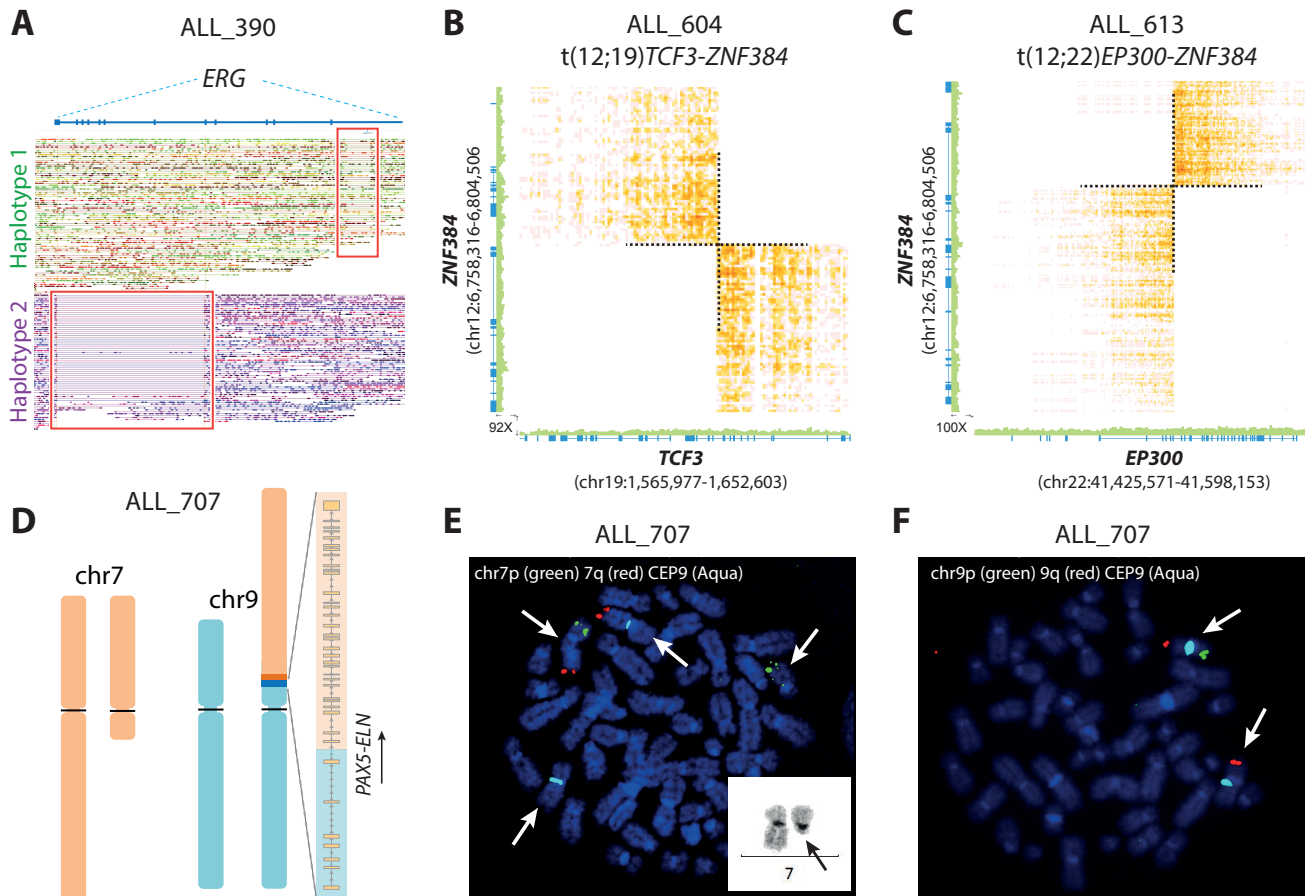

## Figure 6

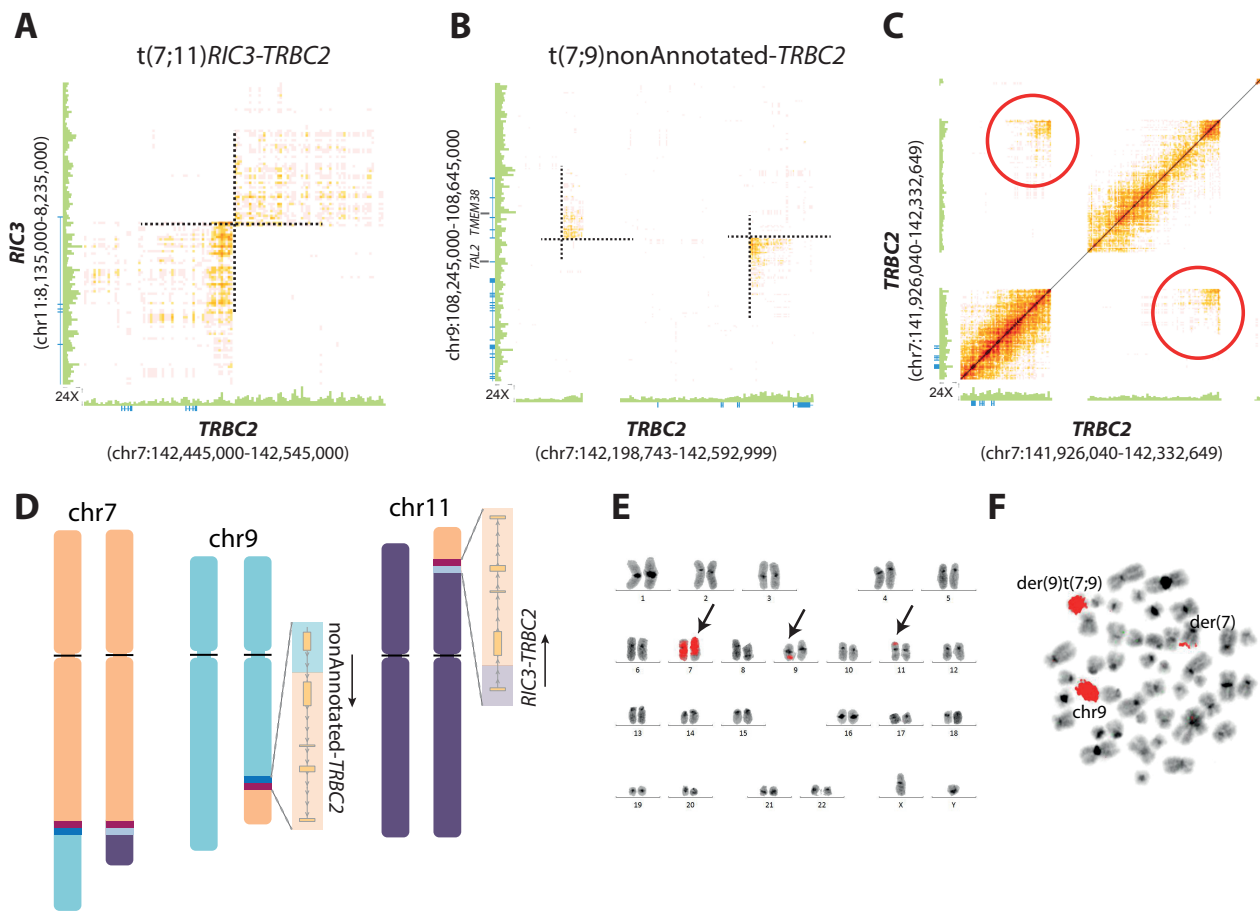

Source: https://www.biorxiv.org/content/biorxiv/early/2018/07/24/375659.full.pdf
